# Supplementary material for: High-resolution characterization of sequence signatures due to non-random cleavage of cell-free DNA
Source: PubMed Central journal article supplement (PMC4469119; doi:10.1186/s12920-015-0107-z), 2015-06-17

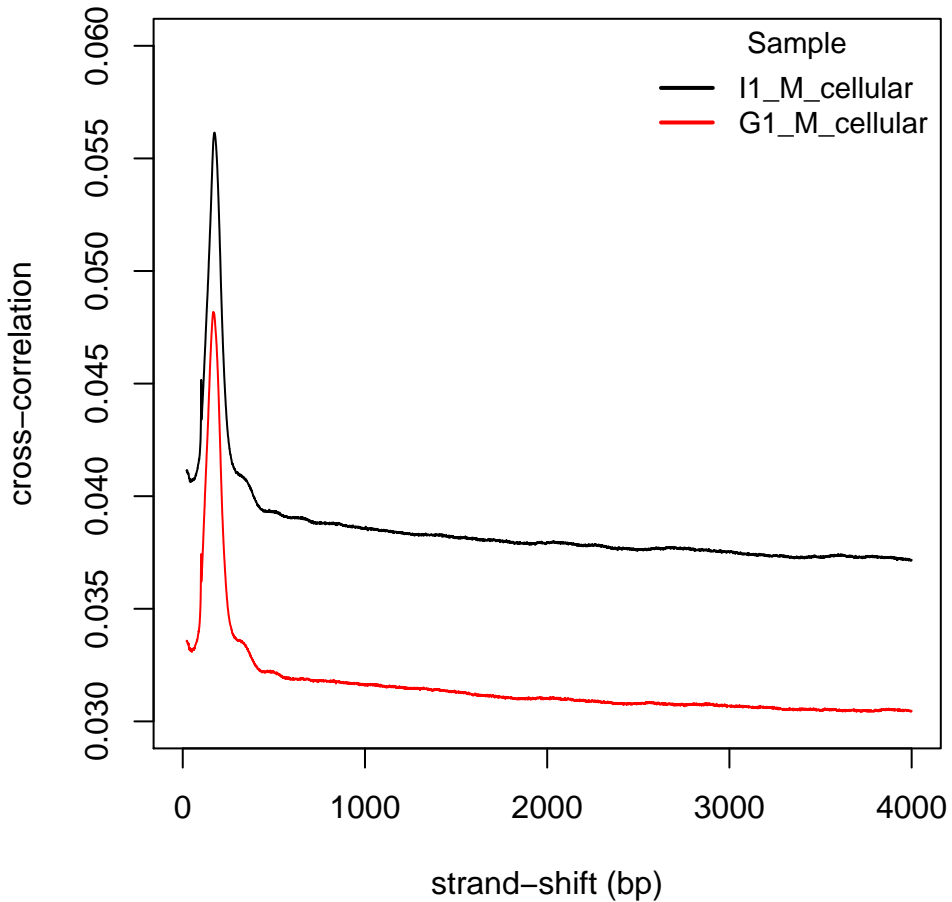

Supplement: 12920_2015_107_MOESM7_ESM.pdf [file 12920_2015_107_MOESM7_ESM.pdf]
