# Supplementary material for: High-resolution characterization of sequence signatures due to non-random cleavage of cell-free DNA
Source: PubMed Central journal article supplement (PMC4469119; doi:10.1186/s12920-015-0107-z), 2015-06-17
Supplement: 12920_2015_107_MOESM10_ESM.pdf [file 12920_2015_107_MOESM10_ESM.pdf]

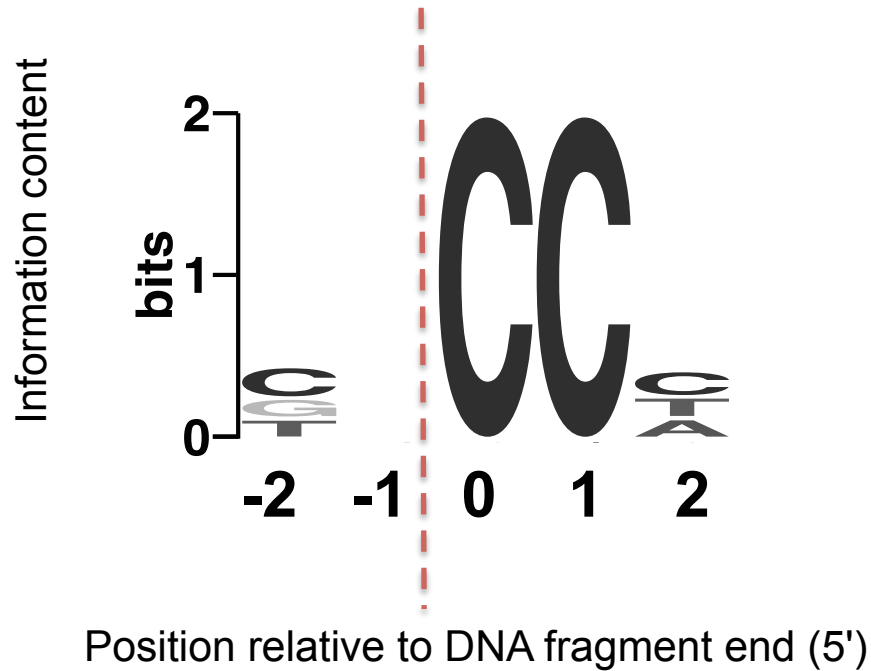

| Sample | Number of fragments that support top sequence motif |                 | E-value *   |
|--------|-----------------------------------------------------|-----------------|-------------|
|        | cell-free DNA                                       | cellular DNA    |             |
| I1_M   | 1421548/10000000                                    | 501496/10000000 | 1.8e-109786 |
| G1_M   | 1665415/10000000                                    | 641746/10000000 | 5.6e-115017 |

\* The enrichment p-value is calculated using the Fisher's Exact Test for enrichment of the motif in cell-free DNA compared to cellular sequences.
